# Supplementary material for: Interventions for increasing colorectal cancer screening uptake among African-American men: A systematic review and meta-analysis
Source: PubMed Central journal article supplement (PMC7494124; doi:10.1371/journal.pone.0238354), 2020-09-16
Supplement: pone.0238354.s001.pdf [file pone.0238354.s001.pdf]

1. exp Colorectal Neoplasms/
2. ((colorectal or colon\*) adj2 (cancer\* or neoplasm\* or tumor\* or carcinoma\*)).ti,ab.
3. or/1-2
4. exp Colonoscopy/
5. exp Colonography, Computed Tomographic/
6. exp Sigmoidoscopy/
7. exp Mass Screening/
8. exp "Early Detection of Cancer"/
9. exp Digital Rectal Examination/
10. ((rectal or colon\*) adj1 exam\*).ti,ab.
11. (colonoscop\* or sigmoidoscop\* or colonography or fobt).ti,ab.
12. screen\*.ti,ab.
13. or/4-12
14. 3 and 13
15. (crc adj1 screen\*).ti,ab.
16. 14 or 15
17. exp African American/
18. (african american\* or black\*).ti,ab.
19. 17 or 18
20. exp MEN/
21. (men or male\*).ti,ab.
22. or/20-21
23. 16 and 19 and 22
