# Supplementary material for: Interventions for increasing colorectal cancer screening uptake among African-American men: A systematic review and meta-analysis
Source: PubMed Central journal article supplement (PMC7494124; doi:10.1371/journal.pone.0238354), 2020-09-16

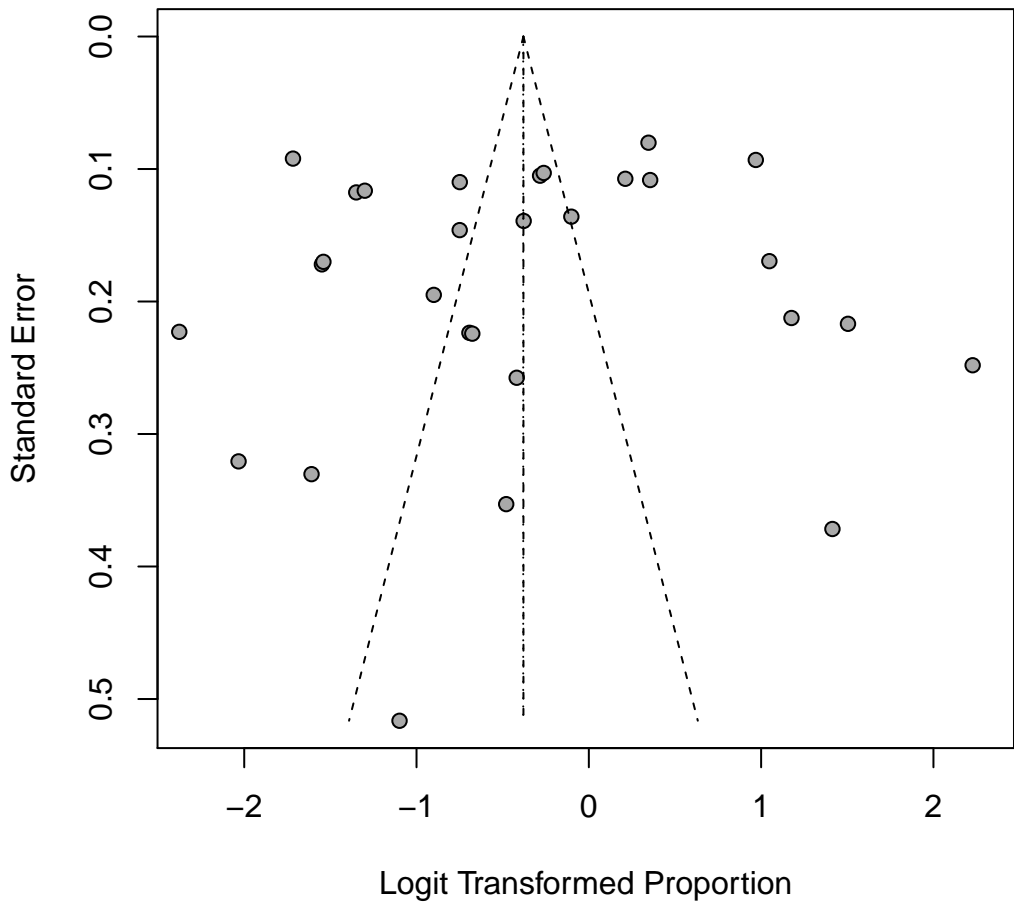

Supplement: pone.0238354.s003.pdf [file pone.0238354.s003.pdf]
